# Supplementary material for: Preparation and electrochemical properties of double-shell LiNi0.5Mn1.5O4 hollow microspheres as cathode materials for Li-ion batteries
Source: Royal Society of Chemistry journal article supplement (doi:10.1039/c6ra05620b), 2016-01-01
Supplement: c6ra05620b1.pdf [file c6ra05620b1.pdf]

## Supporting Information

### **Preparation and electrochemical properties of double-shell LiNi<sub>0.5</sub>Mn<sub>1.5</sub>O<sub>4</sub> hollow microspheres as cathode materials for Li- ion batteries**

**SiXu Deng<sup>a</sup>, DuoLu Mao<sup>b</sup>, Hao Wang <sup>\*a</sup>, Bo Wang<sup>a</sup>, JingBing Liu<sup>a</sup>, YuanLiang  
Ma<sup>b</sup>, Hui Yan<sup>a</sup>**

<sup>a</sup> The College of Materials Science and Engineering, Beijing University of Technology,  
Beijing, 100124, P.R. China

<sup>b</sup> School of Physics and Electronic Information Engineering, Qinghai University for  
Nationalities, Xining, 810007, P.R. China

#### **Corresponding Author**

\* The College of Materials Science and Engineering, Beijing University of Technology,  
Beijing 100124, P. R. China. E-mail: haowang@bjut.edu.cn; Tel: +86-10-6739-2733

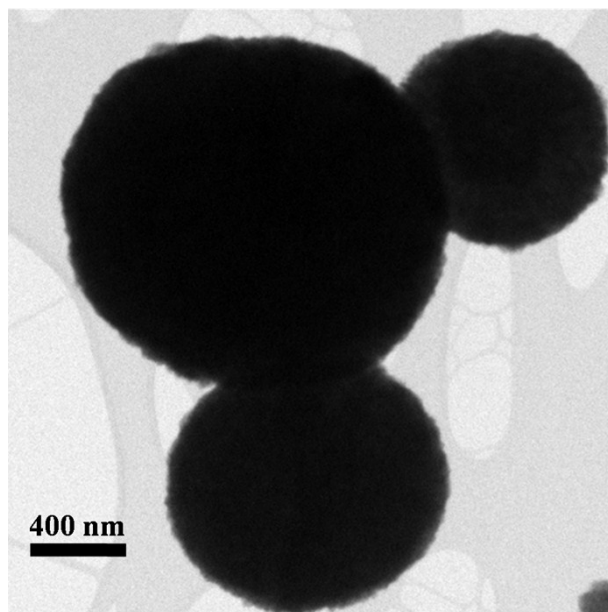

**Fig. S1** TEM images of MnO<sub>2</sub>.

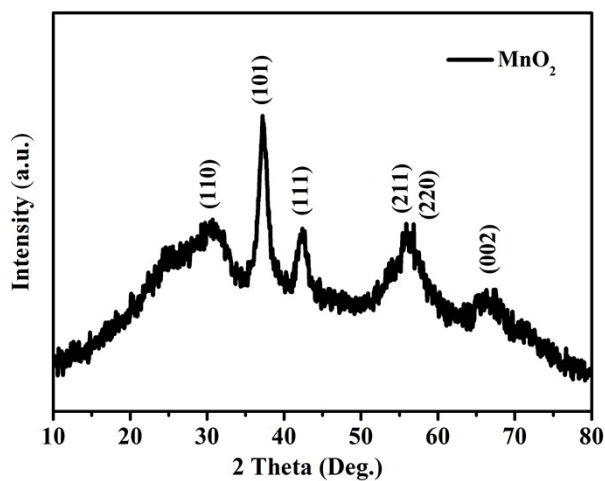

**Fig. S2** XRD patterns of MnO<sub>2</sub> microspheres.

**Fig. S2** shows the XRD pattern of MnO<sub>2</sub> microspheres. All of the diffraction peaks can be indexed to the tetragonal phase of β-MnO<sub>2</sub> (JCPDS, 24-0735), and no other characteristic peaks from impurities are detected in the spectrum.

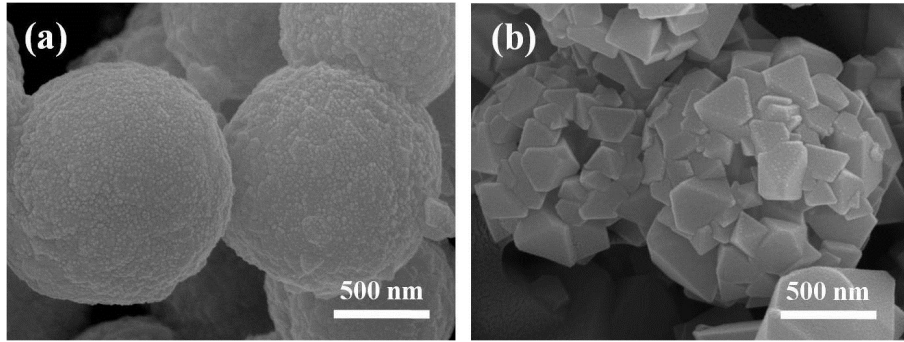

**Fig. S3** SEM images of spherical LNMO heat-treated at 750 °C, 5 h (a), 15 h (b).

As can be seen from Fig. S3(a), the as-obtained LNMO spheres retain the morphology of MnO<sub>2</sub> template with the particle size of about 1 μm after 5 h calcinations. Meanwhile, no broken spheres can be seen in this LNMO sample. Shown in Fig. S3(b) is the SEM image of LNMO powders obtained at 750 °C for 15 h. It can be found that the powders are still composed of spherical structure. However, the primary particles grew bigger than the LNMO-DS shown in paper and gradually broke into nanocrystallites.

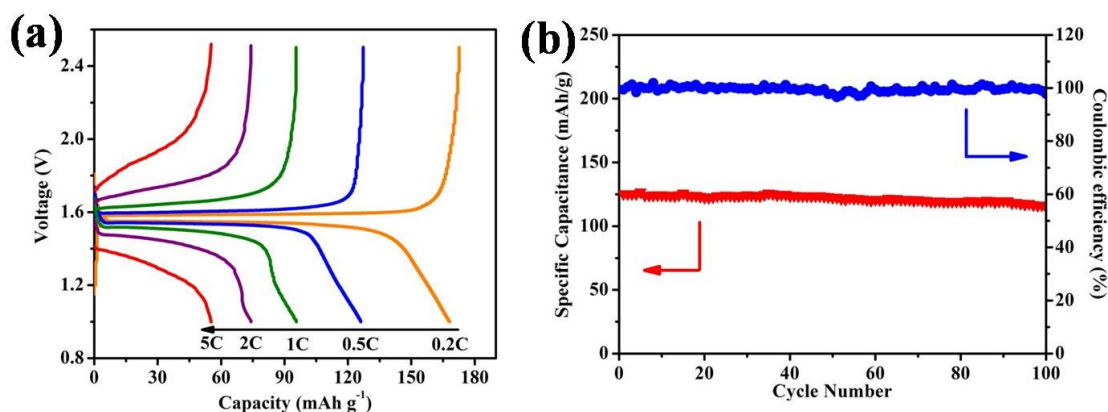

**Fig. S4** Charge and discharge curves of LTO at different rates (a), Cycle performance and Coulombic efficiency of LTO (b). <sup>1</sup>

Fig. S4(a) depicts the first charge/discharge curves of the LTO electrode at the current rates from 0.2 C to 5 C<sup>-1</sup>. At the initial lower rate of 0.2 C, the LTO electrode shows a flat discharge voltage plateau at the potential of ~1.55 V and exhibits a discharge capacity of 168 mAh g<sup>-1</sup>, which is very close to the theoretical capacity of 175 mAh g<sup>-1</sup>. The gap between the charge and discharge is only 0.1 V, indicating no obvious polarization. It is notable that the capacity retention rate at 5 C still maintain nearly 33% of its capacity compared with 0.2 C. For evaluating the cycling stability of the LTO sample, the charge/discharge at a current rate of 0.5 C for 100 cycles is shown in Fig. S4(b). It can be observed that the LTO sample shows a stable discharge capacity. The first discharge capacity is 125 mAh g<sup>-1</sup>, and even after 100 charge/discharge cycles, its capacity also remains as 115 mAh g<sup>-1</sup>. Furthermore, as is shown in Fig. 5, the Coulombic efficiency in this long cycle period still remained almost at 99%. The results show that the prepared LTO electrode has good capacity retention which is suitable to be a negative electrode in LNMO-DS//LTO full-cell.

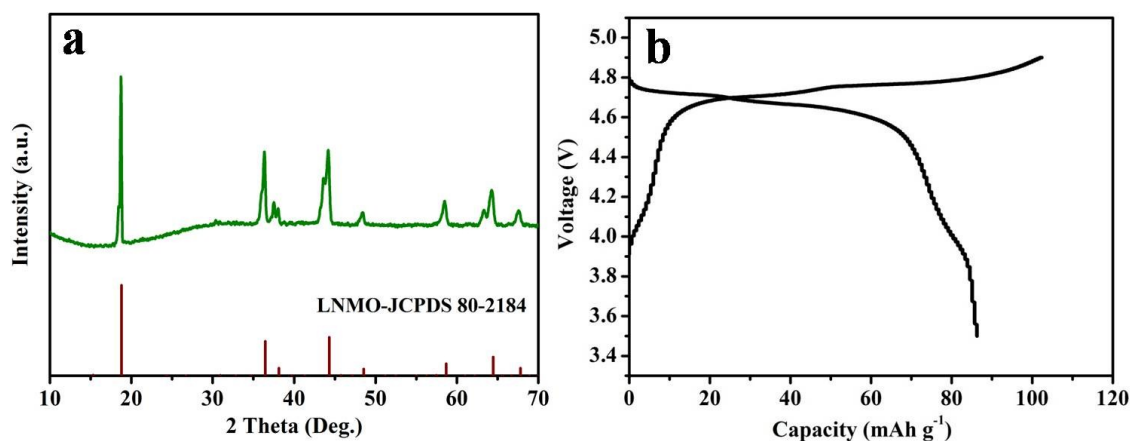

**Fig. S5** XRD patterns of bulk LNMO with heat-treated at 750 °C for 10 h (a), galvanostatic charge/discharge curves of bulk LNMO (750 °C for 10 h) at 1<sup>st</sup> cycles at 0.5 C (b).

Fig. S5 shows the XRD and electrochemical performance of bulk LNMO annealing at 750 °C for 10 h. According to the pattern in Fig. S5 (a), the bulk LNMO did not show pure phase when annealing under 750 °C for 10 h, which demonstrated impurity phases in XRD patterns. Furthermore, it delivers an initial discharge capacity of 86.3 mAh g<sup>-1</sup> with a Coulombic efficiency of 84.6%, which are much lower than the corresponding electrochemical performance of LNMO-bulk (950 °C for 18 h) in this paper.

## References

1. S. Deng, J. Li, S. Sun, H. Wang, J. Liu and H. Yan, *Electrochimica Acta*, 2014, **146**, 37-43.
